# Supplementary material for: Positron emission tomography imaging of novel AAV capsids maps rapid brain accumulation
Source: PubMed Central journal article supplement (PMC7193641; doi:10.1038/s41467-020-15818-4), 2020-04-30
Supplement: 41467_2020_15818_MOESM2_ESM.pdf [file 41467_2020_15818_MOESM2_ESM.pdf]

## **Description of Additional Supplementary Files**

File Name: Supplementary Movie 1

Description: Projected PET/CT images acquired at (a) 4 and (b) 21 hours from mouse injected with  $^{64}\text{Cu}$ -AAV9.

File Name: Supplementary Movie 2

Description: Projected PET/CT images acquired at (a) 4 and (b) 21 hours from mouse injected with  $^{64}\text{Cu}$ -PHP.eB.

File Name: Supplementary Movie 3

Description: Projected PET/CT images acquired at (a) 4 and (b) 21 hours from mouse injected with  $^{64}\text{Cu}$ -AAV9-TC.

File Name: Supplementary Movie 4

Description: Z-stack movie clip of brain endothelium images acquired at 4 hours from mice injected (a) A555- and (b) (NOTA)<sub>8</sub>-A555-PHP.eB.
